# Supplementary material for: Associations between clinical data, vaccination status, antibody responses, and post-COVID-19 symptoms in Thais infected with SARS-CoV-2 Delta and Omicron variants: a 1-year follow-up study
Source: PubMed Central journal article supplement (PMC11460119; doi:10.1186/s12879-024-09999-2), 2024-10-07
Supplement: 12879_2024_9999_MOESM1_ESM.pdf [file 12879_2024_9999_MOESM1_ESM.pdf]

**Questionnaire – Analysis of immune responses and host susceptibility to COVID-19 infection (COVID-19 cases)**

**COVID-19** |\_\_|\_\_|\_\_|

**PATIENT INFORMATION**

**Enrollment Date:** |\_\_|\_|/|\_\_|\_|/|\_\_|\_|

answered by patient       answered by family       answered by other: \_\_\_\_\_

**Known source of COVID-19 cluster**    Yes    No    Unknown

If yes, specify \_\_\_\_\_

**Have a history of returning from abroad after 2020**    Yes    No    Unknown

(If yes, from \_\_\_\_\_ to Thailand at the date |\_\_|\_|/|\_\_|\_|/|\_\_|\_|)

**Have a history of traveling outside the living area within 14 days before onset**

Yes    No    Unknown

(If yes, travel to subdistrict: \_\_\_\_\_ province: \_\_\_\_\_ Date: |\_\_|\_|/|\_\_|\_|/|\_\_|\_|)

**Have a history of living in COVID-19 hitting provinces in the past 1 month?**    Yes    No

Unknown

(If yes, specify \_\_\_\_\_)

**Are you a healthcare worker at risk for COVID-19 infection?**    Yes    No    Unknown

If yes, specify detail of work \_\_\_\_\_

**COVID-19 vaccination**    Yes    No    Unknown

If yes, number of doses received:  1    2    Unknown

Product name of COVID-19 vaccine \_\_\_\_\_

Date of vaccine dose 1: |\_\_|\_|/|\_\_|\_|/|\_\_|\_|   Date of vaccine dose 2: |\_\_|\_|/|\_\_|\_|/|\_\_|\_|

Source of information  Documented evidence    Recall

**completed by** \_\_\_\_\_   **Date:** |\_\_|\_|/|\_\_|\_|/|\_\_|\_|   **Time:** |\_\_|\_|:|\_\_|\_| (24:00)

**Questionnaire – Analysis of immune responses and host susceptibility to COVID-19 infection (COVID-19 cases)**

**COVID-19** |\_\_|\_\_|\_\_|

**PATIENT INFORMATION**

**28 DAY VISIT AFTER ENROLLMENT**

Date |\_\_|\_|/|\_\_|\_|/|\_\_|\_|  In person  By phone

Unable to contact or determine status  Died; date of death |\_\_|\_|/|\_\_|\_|/|\_\_|\_|

answered by patient  answered by family  answered by other: \_\_\_\_\_

**COVID-19 vaccination**  Yes  No  Unknown

If yes, number of doses received:  1  2  Unknown

Product name of COVID-19 vaccine \_\_\_\_\_

Date of vaccine dose 1: |\_\_|\_|/|\_\_|\_|/|\_\_|\_| Date of vaccine dose 2: |\_\_|\_|/|\_\_|\_|/|\_\_|\_|

Source of information  Documented evidence  Recall

**Are you taking any medications now?**  Yes  No **If yes, list medications:**

|    |    |
|----|----|
| 1. | 2. |
| 3. | 4. |

**Since you left the hospital, in general do you feel:**  improved  the same  worse

| <b>Since you left the hospital, have you had any of the following symptoms?</b> |                                    |                                                                           | <input type="radio"/> Yes <input type="radio"/> No <input type="radio"/> Unknown |
|---------------------------------------------------------------------------------|------------------------------------|---------------------------------------------------------------------------|----------------------------------------------------------------------------------|
| <input type="radio"/> Fatigue                                                   | <input type="radio"/> Constipation | <input type="radio"/> Forgetfulness                                       | <input type="radio"/> Chest pain                                                 |
| <input type="radio"/> Cough                                                     | <input type="radio"/> Diarrhea     | <input type="radio"/> Difficulty with thinking and concentration          | <input type="radio"/> Joint pain                                                 |
| <input type="radio"/> Fever                                                     | <input type="radio"/> Weight loss  | <input type="radio"/> Depression                                          | <input type="radio"/> Muscle pain                                                |
| <input type="radio"/> Sore throat                                               | <input type="radio"/> Skin rash    | <input type="radio"/> Fast-beating or pounding heart (heart palpitations) | <input type="radio"/> pain at other site(s): _____                               |
| <input type="radio"/> Congestion or runny nose                                  | <input type="radio"/> Hair loss    |                                                                           |                                                                                  |
| <input type="radio"/> Shortness of breath                                       |                                    |                                                                           |                                                                                  |
| <input type="radio"/> Headache                                                  |                                    |                                                                           |                                                                                  |
| <input type="radio"/> Nausea or vomiting                                        |                                    |                                                                           |                                                                                  |
| <input type="radio"/> other, describe: _____                                    |                                    |                                                                           |                                                                                  |

**Have you been *diagnosed* with any new medical problems?**  Yes  No **If yes, list problems:**

**Have you been re-admitted to hospital for any reason?**  Yes  No **If yes, list reason:**

**Date of re-admission** |\_\_|\_|/|\_\_|\_|/|\_\_|\_| **Hospital** \_\_\_\_\_

**Other information, specify** \_\_\_\_\_

**completed by** \_\_\_\_\_ **Date:** |\_\_|\_|/|\_\_|\_|/|\_\_|\_| **Time:** |\_\_|\_|:|\_\_|\_| (24:00)

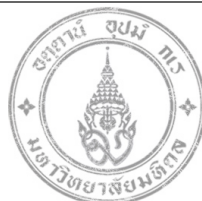

**Questionnaire – Analysis of immune responses and host susceptibility to COVID-19 infection (COVID-19 cases)**

**COVID-19** |\_\_|\_\_|\_\_|

**PATIENT INFORMATION**

**12 MONTH VISIT AFTER ENROLLMENT**

Date |\_\_|\_\_| / |\_\_|\_\_|\_\_| / |\_\_|\_\_|  In person  By phone

Unable to contact or determine status  Died; date of death |\_\_|\_\_| / |\_\_|\_\_|\_\_| / |\_\_|\_\_|

answered by patient  answered by family  answered by other: \_\_\_\_\_

**COVID-19 vaccination**  Yes  No  Unknown

If yes, number of doses received:  1  2  Unknown

Product name of COVID-19 vaccine \_\_\_\_\_

Date of vaccine dose 1: |\_\_|\_\_| / |\_\_|\_\_|\_\_| / |\_\_|\_\_| Date of vaccine dose 2: |\_\_|\_\_| / |\_\_|\_\_|\_\_| / |\_\_|\_\_|

Source of information  Documented evidence  Recall

**Are you taking any medications now?**  Yes  No **If yes, list medications:**

|    |    |
|----|----|
| 1. | 2. |
| 3. | 4. |

**Since you left the hospital, in general do you feel:**  improved  the same  worse

| <b>Since you left the hospital, have you had any of the following symptoms?</b> |                                    |                                                                           | <input type="radio"/> Yes <input type="radio"/> No <input type="radio"/> Unknown |
|---------------------------------------------------------------------------------|------------------------------------|---------------------------------------------------------------------------|----------------------------------------------------------------------------------|
| <input type="radio"/> Fatigue                                                   | <input type="radio"/> Constipation | <input type="radio"/> Forgetfulness                                       | <input type="radio"/> Chest pain                                                 |
| <input type="radio"/> Cough                                                     | <input type="radio"/> Diarrhea     | <input type="radio"/> Difficulty with thinking and concentration          | <input type="radio"/> Joint pain                                                 |
| <input type="radio"/> Fever                                                     | <input type="radio"/> Weight loss  | <input type="radio"/> Depression                                          | <input type="radio"/> Muscle pain                                                |
| <input type="radio"/> Sore throat                                               | <input type="radio"/> Skin rash    | <input type="radio"/> Fast-beating or pounding heart (heart palpitations) | <input type="radio"/> pain at other site(s): _____                               |
| <input type="radio"/> Congestion or runny nose                                  | <input type="radio"/> Hair loss    |                                                                           |                                                                                  |
| <input type="radio"/> Shortness of breath                                       |                                    |                                                                           |                                                                                  |
| <input type="radio"/> Headache                                                  |                                    |                                                                           |                                                                                  |
| <input type="radio"/> Nausea or vomiting                                        |                                    |                                                                           |                                                                                  |
| <input type="radio"/> other, describe: _____                                    |                                    |                                                                           |                                                                                  |

**Have you been *diagnosed* with any new medical problems?**  Yes  No **If yes, list problems:**

**Have you been re-admitted to hospital for any reason?**  Yes  No **If yes, list reason:**

**Date of re-admission** |\_\_|\_\_| / |\_\_|\_\_|\_\_| / |\_\_|\_\_| **Hospital** \_\_\_\_\_

**Other information, specify** \_\_\_\_\_

**completed by** \_\_\_\_\_ **Date:** |\_\_|\_\_| / |\_\_|\_\_|\_\_| / |\_\_|\_\_| **Time:** |\_\_|\_\_:|\_\_|\_\_| (24:00)

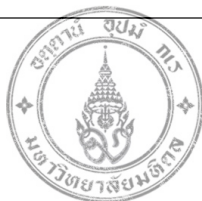

**APPROVED**

ETHICS COMMITTEE  
FACULTY OF TROPICAL MEDICINE  
MAHIDOL UNIVERSITY
